# Supplementary material for: Invasive and Non-Invasive Human Salmonellosis Cases Admitted between 2015 and 2021 in Four Suburban Hospitals in the Metropolitan Area of Milan (Italy): A Multi-Center Retrospective Study
Source: MDPI journal article supplement (doi:10.3390/pathogens12111298), 2023-10-30
Supplement: s1 [file s1]

**Supplementary Table S1.** Differences in frequencies of serogroups with and without antimicrobial resistance in hospitalized patients (data available for 202 patients).

| Serogroups     | Antimicrobial resistance (%) | No Antimicrobial Resistance (%) | p-value          |
|----------------|------------------------------|---------------------------------|------------------|
| <b>O:4</b>     | <b>78 (63,9%)</b>            | <b>29 (36,3%)</b>               | <b>&lt;0,001</b> |
| <b>O:9</b>     | <b>10 (8,2%)</b>             | <b>30 (37,5%)</b>               | <b>&lt;0,001</b> |
| <b>O:7</b>     | 13 (10,7%)                   | 8 (10%)                         | 0,856            |
| <b>ND</b>      | 16 (13,1%)                   | 5 (6,3%)                        | 0,200            |
| <b>O:8</b>     | 3 (2,5%)                     | 4 (5,0%)                        | 0,441            |
| <b>O:3,10</b>  | 0                            | 2 (2,5%)                        | 0,159            |
| <b>O:11</b>    | 1 (0,8%)                     | 1 (1,2%)                        | 0,641            |
| <b>O:13</b>    | 1 (0,8%)                     | 1 (1,2%)                        | 0,641            |
| <b>O:2</b>     | 0                            | 0                               | /                |
| <b>Overall</b> | 122 (100%)                   | 80 (100%)                       |                  |

**Supplementary Table S2.** Frequency of antibiotic resistance in O:9 isolates and other than O:9 isolates in hospitalized patients.

|            | Other than O:9 (n=196) | O:9 (n=56)       | p-value          |
|------------|------------------------|------------------|------------------|
| <b>AMK</b> | <b>13 (6,6%)</b>       | <b>8 (14,3%)</b> | <b>0,034</b>     |
| <b>GEN</b> | 19 (9,7%)              | 9 (16,1%)        | 0,068            |
| <b>AMC</b> | <b>51 (26,0%)</b>      | <b>1 (1,8%)</b>  | <b>&lt;0,001</b> |
| <b>AMP</b> | <b>42 (21,4%)</b>      | <b>0</b>         | <b>&lt;0,001</b> |
| <b>CTX</b> | 4 (2,0%)               | 0                | 0,428            |
| <b>CAZ</b> | 6 (3,1%)               | 0                | 0,597            |
| <b>CAF</b> | 9 (4,6%)               | 0                | 0,212            |
| <b>CIP</b> | 17 (8,7%)              | 1 (1,8%)         | 0,205            |
| <b>TZP</b> | 5 (2,6%)               | 0                | 0,586            |
| <b>SXT</b> | <b>18 (9,2%)</b>       | <b>0</b>         | <b>0,027</b>     |

AMK amikacin, AMC amoxicillin/clavulanate, AMP ampicillin, CTX cefotaxime, CAZ ceftazidime, CAF ceftriaxone, CIP ciprofloxacin, GEN gentamicin, TZP piperacillin/tazobactam, SXT trimethoprim/sulfamethoxazole
